# Supplementary material for: Structural and physiological analyses in Salsoleae (Chenopodiaceae) indicate multiple transitions among C3, intermediate, and C4 photosynthesis
Source: PubMed Central journal article supplement — J Exp Bot. 2013 Jul 23;64(12):3583–604. doi: 10.1093/jxb/ert191 (PMC3745723; doi:10.1093/jxb/ert191), 2013-07-23
Supplement: supp_ert191_jexbot097188_file001.pdf [file supp_ert191_jexbot097188_file001.pdf]

Structural and physiological analyses in Salsoleae (Chenopodiaceae) indicate multiple transitions among C<sub>3</sub>, intermediate and C<sub>4</sub> photosynthesis.

Elena V. Voznesenskaya, Nuria K. Koteyeva, Hossein Akhiani, Eric H. Roalson, and Gerald E. Edwards

Table S1 and S2 show quantitative information on different tissue measured from light micrographs of leaf cross sections. Results from this study show the first four species, *S. genistoides*, *S. masenderanica*, *S. montana*, and *S. webbi* are C<sub>3</sub> species, and *S. divaricata* is a C<sub>3</sub>-C<sub>4</sub> intermediate. Data is also shown for *S. arbusculiformis* a C<sub>3</sub>-C<sub>4</sub> intermediate (Voznesenskaya et al 2001) the C<sub>4</sub> species *X. richteri*, *C. orientale*, and the C<sub>4</sub> species *S. arbuscula* (see Voznesenskaya et al. 2001).

Appendix S1 includes review of the sampling information for phylogenetic analysis. GenBank accession numbers for ITS sequences follow species names. This includes numbers for the new sequence information that was generated in this study for *S. genistoides* and *S. webbi*; the corresponding voucher numbers of specimens available at the WSU herbarium are:

*Salsola genistoides* Juss. ex Poir WS386418

*Salsola webbi* Moq. WS386419

Table S1. Mesophyll cell (M1, M2), hypodermal cell (H), bundle sheath cell (BS), Kranz like cell (KLC), and Kranz cell (KC) sizes of *Salsola* s.l. species. The C<sub>3</sub> species have BS cells, the C<sub>3</sub>-C<sub>4</sub> species have KLC, the C<sub>4</sub> species have KC and H cells (instead of M1).

| Species                                                  | M1or H       |             | M2           |             | Ratio M1/M2, H/M2 |       | M1+M2        | BS, KLC, KC             |
|----------------------------------------------------------|--------------|-------------|--------------|-------------|-------------------|-------|--------------|-------------------------|
|                                                          | Length<br>μm | Width<br>μm | Length<br>μm | Width<br>μm | Length            | Width | Length<br>μm | Area<br>μm <sup>2</sup> |
| <i>S. genistoides</i> C <sub>3</sub>                     | 72.3±2.4     | 17.9±0.5    | 84.3±2.4     | 19.3±0.5    | 0.9               | 0.9   | 168.4±3.9    | 935.0±106.9             |
| <i>S. masenderanica</i> C <sub>3</sub>                   | 106.4±4.4    | 31.3±4.4    | 153.4±8.1    | 29.0±1.3    | 0.7               | 1.1   | 230.8±6.1    | 785.8±42.5              |
| <i>S. montana</i> C <sub>3</sub>                         | 153.1±9.3    | 35.7±2.1    | 152.8±7.5    | 33.4±1.9    | 1.0               | 1.1   | 317.6±7.9    | 836.6±58.4              |
| <i>S. webbii</i> C <sub>3</sub>                          | 85.0±5.1     | 28.5±1.3    | 79.8±3.7     | 31.5±0.8    | 1.1               | 0.9   | 146.1±4.4    | 666.0±42.0              |
| <i>S. arbusculiformis</i> C <sub>3</sub> -C <sub>4</sub> | 38.3±1.9     | 12.8±0.5    | 63.0±1.6     | 10.3±0.3    | 0.6               | 1.2   | 102.0±14.9   | 207.3±17.5              |
| <i>S. divaricata</i> C <sub>3</sub> -C <sub>4</sub>      | 48.4±2.5     | 20.5±0.7    | 100.1±1.7    | 12.5±0.5    | 0.5               | 1.6   | 158.9±2.9    | 544.3±35.1              |
| <i>C. orientale</i> , C <sub>4</sub>                     | 28.5±2.7     | 26.1±2.2    | 69.7±2.3     | 14.7±1.7    | 0.4               | 1.8   | 94.3±4.4     | 611.1±43.0              |
| <i>X. richteri</i> , C <sub>4</sub>                      | 32.5±2.5     | 30.5±1.4    | 55.6±1.5     | 12.5±0.4    | 0.6               | 2.5   | 72.1±3.4     | 331.4±22.6              |

Table 2S. Volume density of tissues (%) and ratios of M/BS in C<sub>3</sub>, M/KLC in C<sub>3</sub>-C<sub>4</sub>, and M/KC in C<sub>4</sub> species of representative *Salsola* s.l.

| Species                                                  | % volume density of tissue in leaves |          |          |                 |              |           |                     |                        |
|----------------------------------------------------------|--------------------------------------|----------|----------|-----------------|--------------|-----------|---------------------|------------------------|
|                                                          | Epidermis                            | Hypoderm | M        | BS<br>KLC<br>KC | Chlorenchyma | WS        | Central<br>cylinder | M/BS<br>M/KLC<br>M/KC* |
| <i>S. genistoides</i> C <sub>3</sub>                     | 9.8±0.1                              | n/a      | 64.7±0.2 | 4.5±0.9         | 69.2±0.7     | 20.0±0.6  | 0.9±0.04            | 15.0                   |
| <i>S. masenderanica</i> C <sub>3</sub>                   | 10.1±0.2                             | n/a      | 54.1±6.5 | 6.8±0.9         | 61.0±5.5     | 27.1±5.3  | 1.8±0.3             | 9.0                    |
| <i>S. montana</i> C <sub>3</sub>                         | 9.2±0.9                              | n/a      | 57.5±6.3 | 4.0±0.3         | 61.5±6.3     | 28.0±6.9  | 1.4±0.2             | 14.7                   |
| <i>S. webbii</i> C <sub>3</sub>                          | 16.9±0.9                             | n/a      | 57.4±6.1 | 6.8±0.5         | 64.2±5.8     | 17.8±3.3  | 1.0±0.3             | 8.7                    |
| <i>S. arbusculiformis</i> C <sub>3</sub> -C <sub>4</sub> | 7.8±0.1                              | n/a      | 49.5±0.2 | 4.7±0.1         | 54.2±0.3     | 35.5±0.1  | 2.5±0.4             | 10.5                   |
| <i>S. divaricata</i> C <sub>3</sub> -C <sub>4</sub>      | 7.1±0.5                              | n/a      | 31.2±1.3 | 6.1±0.3         | 37.3±1.2     | 54.7±0.5  | 0.9±0.3             | 5.2                    |
| <i>C. orientale</i> , C <sub>4</sub> NAD-ME              | 11.4±0.1                             | 10.2±1.1 | 28.5±1.2 | 6.4±0.02        | 34.9±1.3     | 42.6±0.1  | 0.9±0.2             | 4.5                    |
| <i>X. richteri</i> , C <sub>4</sub> NADP-ME              | 11.9±1.6                             | 12.8±0.1 | 19.2±2.3 | 10.0±1.4        | 29.2±3.7     | 36.9±11.0 | 9.2±5.8             | 1.9                    |
| <i>X. arbuscula</i> C <sub>4</sub><br>NADP-ME            | 13.5±0.4                             | 12.9±0.6 | 24.6±0.6 | 11.8±0.4        | 36.4±0.2     | 35.4±0.1  | 1.8±0.1             | 2.1                    |

\*Ratio of the volume densities of M tissue to BS, M to KLC, and M to KC tissue.

Appendix S1. Sampling table for phylogenetic analysis. GenBank accession numbers for ITS sequences follow species names.

*Anabasis aphylla* L., EF453380, HM131608, HM131609; *A. brevifolia* C.A.Mey., HM131610; *A. calcarea* (Charif & Aellen) Bokhari & Wendelbo, EF453381; *A. cretacea* Pall., HM131611; *A. elatior* (C.A.Mey.) Schischk., HM131612; *A. eriopoda* (C.A.Mey.) Benth., EF453383, HM131613; *A. eugeniae* Iljin, EF453384; *A. hausskenchtii* Bunge ex Boiss., EF453386, EF453387; *A. iranica* Iljin, EF453382; *A. jaxartica* (Bunge) Benth. ex Volkens, EF453385; *A. pellicotii* Danguy, HM131614; *A. truncata* (Schrenk) Bunge, HM131615; *Caroxylon canescens* (Moq.) Akhani & Roalson, EF453503; *C. chorassanicum* (Botsch.) Akhani & Roalson, EF453487; *Climacoptera korshinskyi* (Drob.) Botsch., AY556441; *C. subcrassa* (M.Pop.) Botsch., AY556440; *Cornulaca aucheri* Moq., EF453405; *C. monacantha* Delile, EF453406; *Cyatobasis fruticulosa* (Bunge) Aellen, EF453516; *Girgensohnia imbricata* Bunge, EF453412; *G. minima* K.Korov., EF453413; *G. oppositiflora* (Pall.) Fenzl, EF453414, HM131626; *Halogeton alopecuroides* (Delile) Moq., EF453430; *H. arachnoideus* Moq., HM131630; *H. glomeratus* (M.Bieb.) C.A.Mey., EF453431, HM131631; *Halothamnus glaucus* (M.Bieb.) Botsch., EF453434; *H. auriculus* (Moq.) Botsch., EF453433; *H. auriculus* subsp. *acutifolius* (Moq.) Kothe-Heinr., EF453432; *H. subaphyllus* (C.A.Mey.) Botsch., EF453435; *Haloxylon ammodendron* (C.A.Mey.) Bunge ex Fenzl, EF453436, HM131632; *H. persicum* Bunge ex Boiss. & Buhe, EF453438, HM131633; *Hammada articulata* (Moq.) O.Bolos & Vigo, EF453440; *H. griffithii* (Moq.) Iljin, EF453437; *H. salicornica* (Moq.) Iljin, EF453439; *Horaninowia platyptera* Charif & Aellen, EF453441; *H. pungens* (Gilli) Botsch., EF453442; *H. ulicina* Fisch. & C.A.Mey, EF453443, HM131634; *Iljinia regelii* (Bunge) Korov., HM131635; *Noaea major* Bunge, EF453450; *N. minuta* Boiss. & Ball, EF453451; *N. mucronata* (Forssk.) Asch. & Schweinf., EF453452; *Ofaiston monandrum* (Pall.) Moq., EF453453; *Petrosimonia brachiata* (Pall.) Bunge, EF453457; *Raphidophyton regelii* (Bunge) Iljin, EF453459; *Salsola annua* (Bunge) Akhani, EF453389; *S. aperta* Pauls., HM131644; *S. arbuscula* Pall., HM131645; *S. arbusculiformis* Drob., EF453468, HM131646; *S. chinghaiensis* A.J.Li, HM131647; *S. collina* Pall., HM131649, HM131648; *S. divaricata* Masson ex Link, EF453474; *S. drummondii* Ulbr., EF453475; *S. florida* (M.Bieb.) Poir., EF453507; *S. foliosa* (L.) Schrad., AF318652, HM131651; *S. genistoides* Poir., KF110741; *S. griffithii* (Bunge) Freitag & Khani, EF453482; *S. kernerii* (Wol.) Botsch., EF453486; *S. komarovii* Iljin, HM131654; *S. lachnantha* (Botsch.) Botsch., EF453488; *S. laricifolia* Turcz. ex Litv., HM131655; *S. masenderanica* Botsch., EF453504; *S. monoptera* Bunge, HM131658, HM131659, HM131660; *S. montana* Litv., EF453489, EF453490; *S. nitraria* Pall., AY556439; *S. paulsenii* Litv., AF318647, HM131663; *S. pellucida* Litv., HM131664; *S. praecox* Litv., AY556442, HM131665; *S. rosacea* L., HM131666; *S. rosmarinus* (Ehrenb. ex Boiss.) Akhani, EF453506; *S. ruthenica* Iljin, HM131667, HM131668; *S. soda* L., EF453496, EF453497; *S. stocksii* Boiss., EF453512; *S. "touranica"*, EF453505; *S. tragus* L., AF318648, HM131652; *S. vvdenskyi* Iljin & M.Popov, EF453462; *S. webbii* Moq., KF110740; *S. zaidamica* Iljin, HM131669, HM131670; *S. zygophylla* Batt. ex Trab., AF318651; *S. zygophylloides* (Aellen & Townsend) Akhani, EF453513; *Sympegma regelii* Bunge, EF453510, HM131676; *Traganum nudatum* Del., EF453511; *Turania aperta* (Pauls.) Akhani, EF453466; *T. deserticola* (Iljin) Akhani, EF453473; *Xylosalsola arbuscula* (Pall.) Tzvelev., EF453467; *X. chivensis* (M.Pop.) Akhani & Roalson, AF318642; *X. richteri* (Moq.) Akhani & Roalson, EF453494.
